# Supplementary material for: Colorimetric immunosensor constructed using 2D metal–organic framework nanosheets as enzyme mimics for the detection of protein biomarkers
Source: Royal Society of Chemistry journal article supplement (doi:10.1039/d1tb02192c), 2021-12-09
Supplement: d1tb02192c1.pdf [file d1tb02192c1.pdf]

# **Colorimetric immunosensor constructed by 2D metal-organic frameworks nanosheets as enzyme mimics for the detection of protein biomarker**

Yujing Zeng,<sup>a</sup> Minghui Wang,<sup>a</sup> Zhaowei Sun,<sup>\*b</sup> Lingjun Sha,<sup>c</sup> Jie Yang<sup>a</sup> and Genxi Li<sup>\*ac</sup>

<sup>a</sup> State Key Laboratory of Pharmaceutical Biotechnology, School of Life Sciences, Nanjing University, Nanjing 210023, P. R. China. E-mail: genxili@nju.edu.cn

<sup>b</sup> School of Life Sciences, Zhengzhou University, Zhengzhou, 450001, P. R. China. E-mail: szw@zzu.edu.cn

<sup>c</sup> Center for Molecular Recognition and Biosensing, School of Life Sciences, Shanghai University, Shanghai 200444, P. R. China

## **Table of Contents**

|                  |     |
|------------------|-----|
| Figure S1.....   | S-2 |
| Figure S2.....   | S-2 |
| Figure S3.....   | S-3 |
| Figure S4.....   | S-3 |
| Figure S5.....   | S-4 |
| Figure S6.....   | S-4 |
| Figure S7.....   | S-5 |
| Figure S8.....   | S-5 |
| Figure S9.....   | S-6 |
| Table S1 .....   | S-6 |
| References ..... | S-7 |

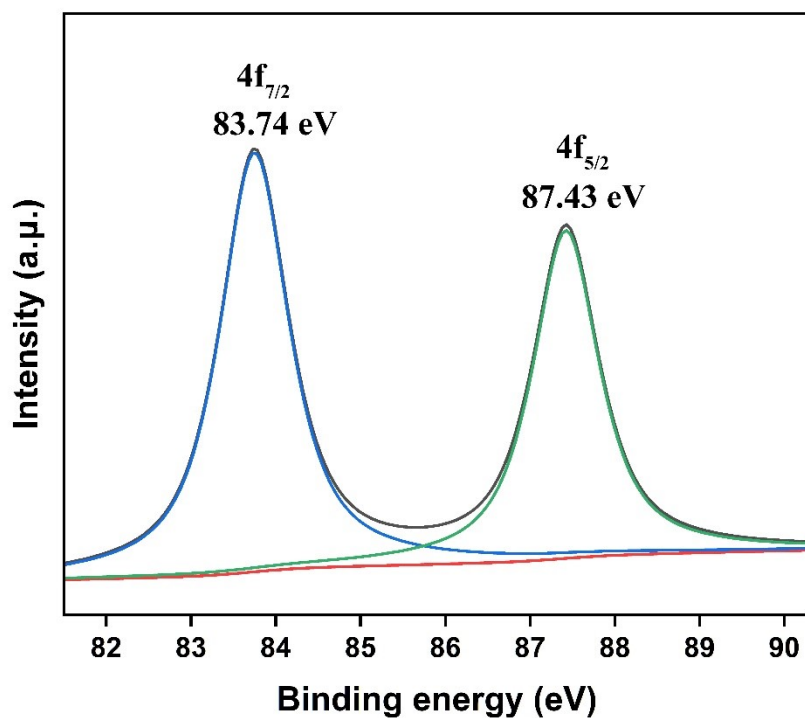

**Figure S1** Au 4f XPS spectrum of Au NPs/Cu-TCPP hybrid nanosheets.

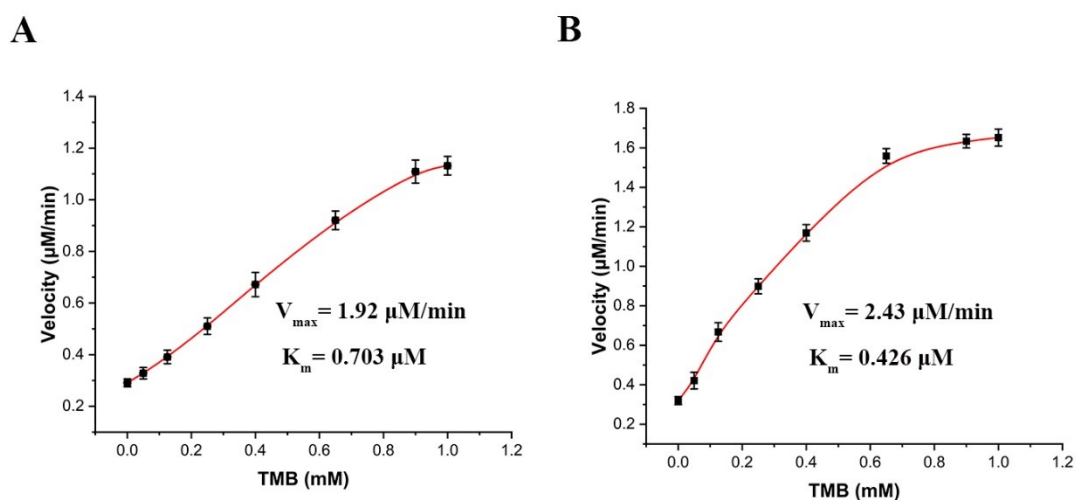

**Figure S2** Variance of initial velocity of (A) Cu-TCPP nanosheets and (B) AuNP/Cu-TCPP hybrid nanosheets in response to various concentrations of TMB substrate. The material concentration is 2.5 μg/mL. Error bars represent the standard derivation of three independent experiments.

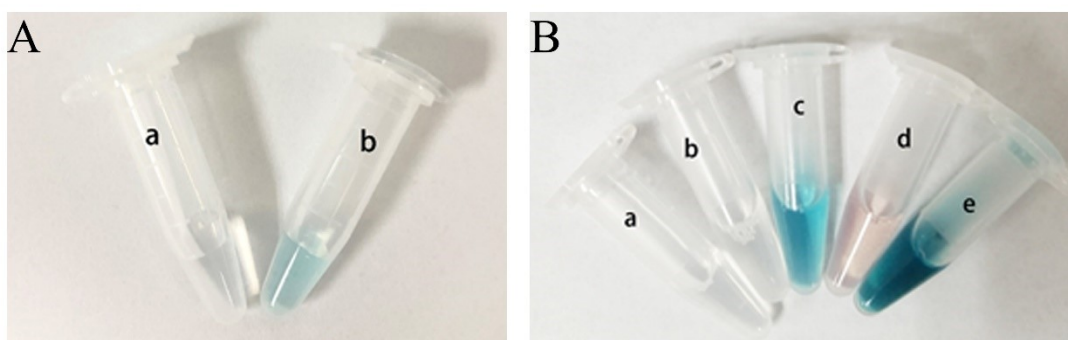

**Figure S3** Photographs of colorimetric reaction in different cases. A: (a)  $\text{Cu}(\text{NO}_3)_2 \cdot 3\text{H}_2\text{O} + \text{TMB} + \text{H}_2\text{O}_2$ , (b) Tetrakis (4-carboxyphenyl) porphyrin (Fe)+TMB+ $\text{H}_2\text{O}_2$ ; B: (a) TMB, (b) TMB+ $\text{H}_2\text{O}_2$ , (c) Cu-TCPP nanosheets+TMB+ $\text{H}_2\text{O}_2$ , (d) AuNPs+TMB+ $\text{H}_2\text{O}_2$ , and (e) AuNPs/Cu-TCPP hybrid nanomaterials+TMB+ $\text{H}_2\text{O}_2$ .

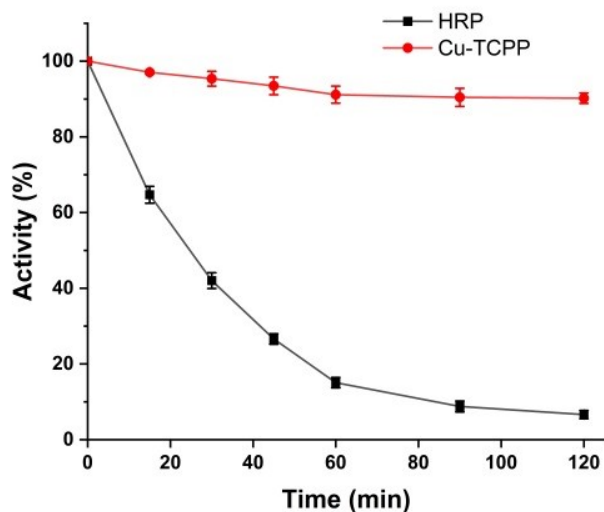

**Figure S4** The enzyme activities of HRP and AuNPs/Cu-TCPP after treated at 40°C for different time. Error bars represent the standard derivation of three independent experiments.

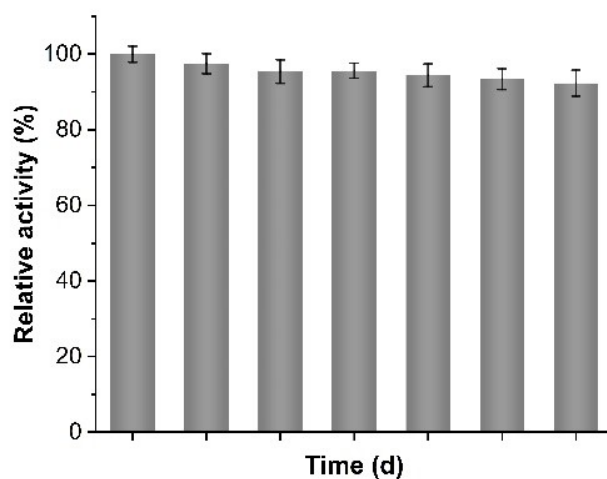

**Figure S5** The stability of the AuNPs/Cu-TCPP materials. Error bars represent the standard derivation of three independent experiments.

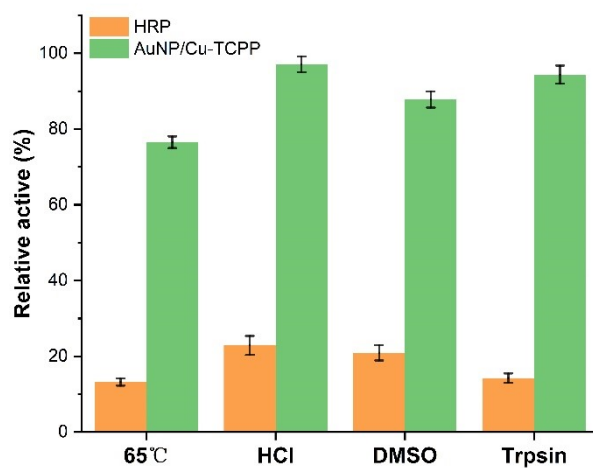

**Figure S6** Activity of HRP and AuNPs/Cu-TCPP after treatment under different harsh conditions for 1h. Error bars represent the standard derivation of three independent experiments.

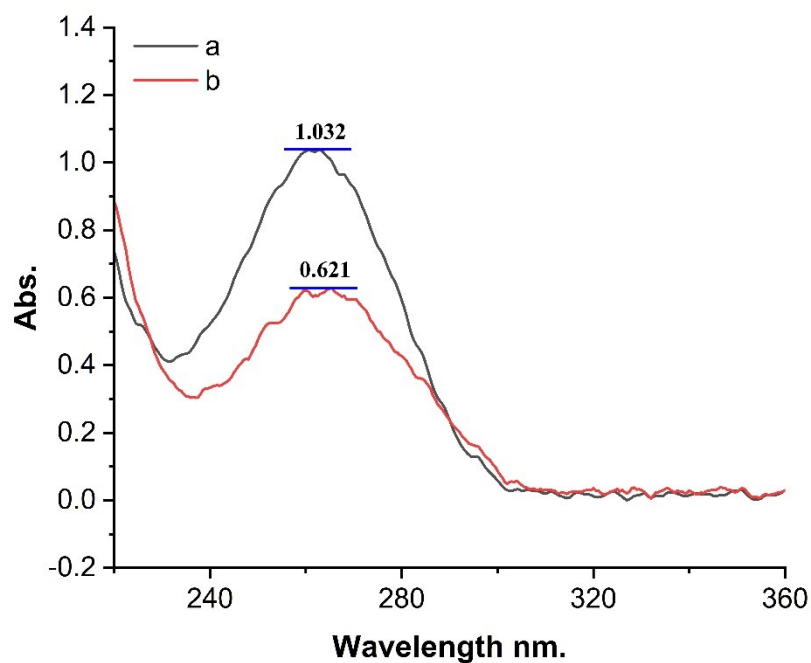

**Figure S7** The supernatant of DNA is determined by UV/Vis spectroscopy after incubation without (a) and with (b) Cu-TCPP nanosheets for 1 h, the values of absorbance at the 260 nm are labeled (Cu-TCPP: 25  $\mu$ L with 100  $\mu$ g/mL; DNA: 25  $\mu$ L with 10  $\mu$ M).

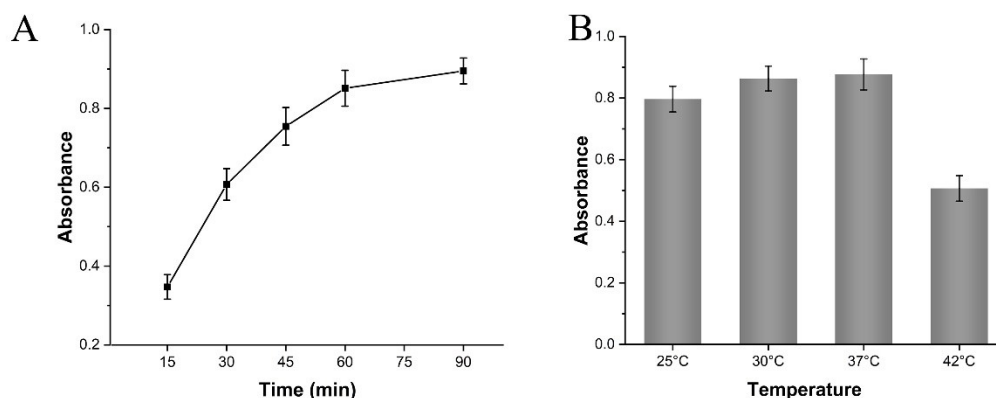

**Figure S8** Optimization of (A) the incubation time of the AuNPs/Cu-TCPP materials and (B) the temperature of colorimetric reaction. Error bars represent the standard derivation of three independent experiments.

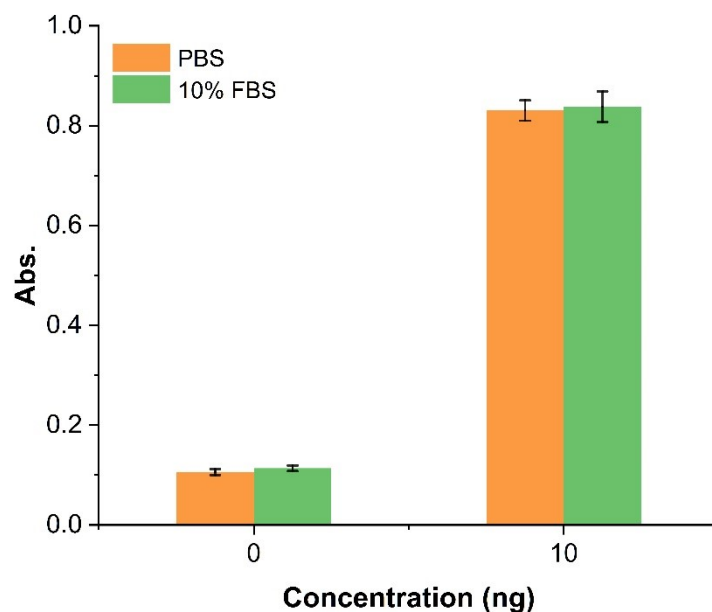

**Figure S9** Peak currents obtained by UV/Vis spectroscopy response to different concentrations of CEA diluted in PBS and 10% FBS. Error bars represent the standard deviations of three independent experiments.

**Table S1** Comparisons of this immunosensor with previous methods.

| Method                                                        | Linear range (ng/mL) | LOD (pg/mL) |
|---------------------------------------------------------------|----------------------|-------------|
| Electrochemical immunosensor <sup>1</sup>                     | 0.0005 - 50          | 0.167       |
| Colorimetric Immunoassay <sup>2</sup>                         | 0.05 - 100           | 21.1        |
| Nanopore-based strategy <sup>3</sup>                          | 2 - 200              | 0.6         |
| Fluorescence resonance energy transfer biosensor <sup>4</sup> | 0.004 - 0.1          | 1.7         |
| Microfluidic paper-based immunosensor <sup>5</sup>            | 0.05 - 500           | 10          |
| This proposed method                                          | 0.001 - 1000         | 0.742       |

## References

1. H. Lv, Y. Li, X. Zhang, Z. Gao, C. Zhang, S. Zhang and Y. Dong, *Biosensors and Bioelectronics*, 2018, **112**, 1-7.
2. S. Wu, H. Tan, C. Wang, J. Wang and S. Sheng, *ACS Appl Mater Interfaces*, 2019, **11**, 43031-43038.
3. H. Tang, H. Wang, C. Yang, D. Zhao, Y. Qian and Y. Li, *Anal. Chem.*, 2020, **92**, 3042-3049.
4. H. Li, L. Shi, D. E. Sun, P. Li and Z. Liu, *Biosens Bioelectron*, 2016, **86**, 791-798.
5. Y. Wang, H. Xu, J. Luo, J. Liu, L. Wang, Y. Fan, S. Yan, Y. Yang and X. Cai, *Biosens Bioelectron*, 2016, **83**, 319-326.
